# Supplementary material
Source: PubMed Central journal article supplement (PMC8977390)
Supplement: NIHMS1741903-supplement-1.pdf [file NIHMS1741903-supplement-1.pdf]

**Supplemental Table S1**

*Availability of measures in the larger longitudinal Pittsburgh Girls Study and timepoints of data used in the current analysis*

| Measure                                   | Data availability in the larger longitudinal Pittsburgh Girls Study |                          | Time points of data used in current analysis |                                   |                                      |                           |                 |
|-------------------------------------------|---------------------------------------------------------------------|--------------------------|----------------------------------------------|-----------------------------------|--------------------------------------|---------------------------|-----------------|
|                                           | Informant <sup>a</sup>                                              | Ages with available data | Preadolescence (age 11-13)                   | Pre-pregnancy (age varied: 13-20) | During pregnancy (age varied: 14-20) | Birth (age varied: 14-21) | Infant 3 months |
| <b>Mood</b>                               |                                                                     |                          |                                              |                                   |                                      |                           |                 |
| Positive mood                             | Participant                                                         | 13-21 years              |                                              | X                                 | X                                    |                           |                 |
| Depressed mood                            | Participant                                                         | 8-21 years               |                                              | X                                 | X                                    |                           |                 |
| <b>Contextual factors</b>                 |                                                                     |                          |                                              |                                   |                                      |                           |                 |
| Perceived trust/attachment with caregiver | Participant                                                         | 11-21 years              | X                                            |                                   | X                                    |                           |                 |
| Neighborhood support                      | Participant's caregiver                                             | 8-17 years               | X                                            |                                   |                                      |                           |                 |
| Contextual life stressors                 | Participant's caregiver                                             | 8-17 years               | X                                            |                                   |                                      |                           |                 |
|                                           | Participant                                                         | 18-21 years              |                                              |                                   |                                      |                           |                 |
| <b>Offspring outcomes</b>                 |                                                                     |                          |                                              |                                   |                                      |                           |                 |
| Birth outcomes                            | Participant                                                         | Birth                    |                                              |                                   |                                      | X                         |                 |
| Infant emotions                           | Observational coding                                                | 3-months                 |                                              |                                   |                                      |                           | X               |

*Note.* <sup>a</sup> Participant refers to the adolescent, whereas ‘participant’s caregiver’ refers to the adolescent’s caregiver. Because data on life stress and neighborhood support were only available up to age 17, these measures were not available during the year of pregnancy for most participants; thus, trust/attachment with caregiver was the only family contextual factor assessed during pregnancy that was able to be included in the final path analysis model.
